# Supplementary material
Source: publisher site journal article supplement (https://www.dovepress.com/article/321763)

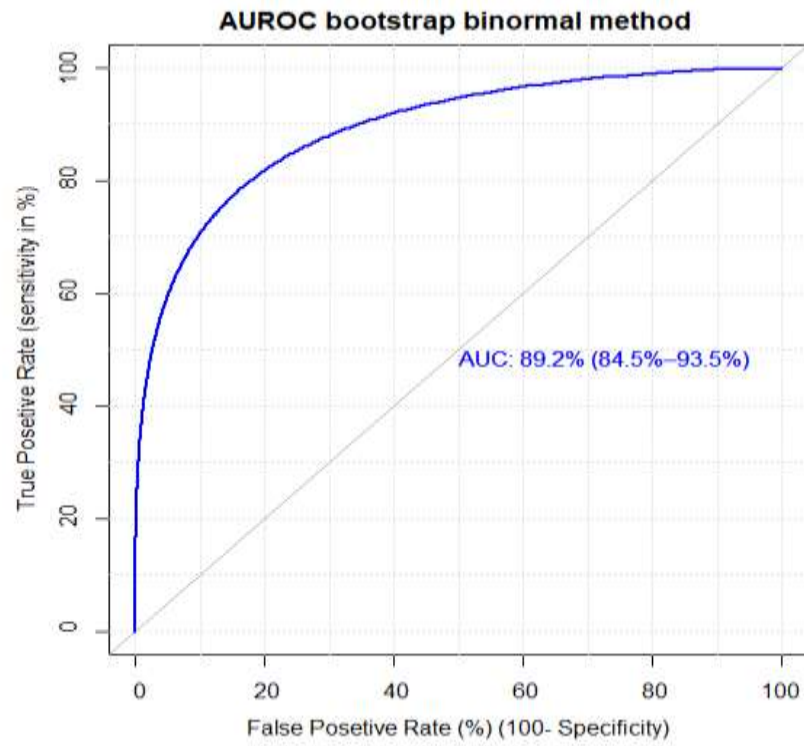

Figure 1: Area under the receiver operating characteristics after internal validation.

Supplement: Supplementary file 1 [file Supplementary_figure_1.pdf › Supplementary_figure_1.pdf]
